# Supplementary material for: Fetal Growth Restriction and Subsequent Low Grade Fetal Inflammatory Response Are Associated with Early-Onset Neonatal Sepsis in the Context of Early Preterm Sterile Intrauterine Environment
Source: MDPI journal article supplement (doi:10.3390/jcm10092018), 2021-05-08
Supplement: s1 [file s1]

### *Supplementary Materials*

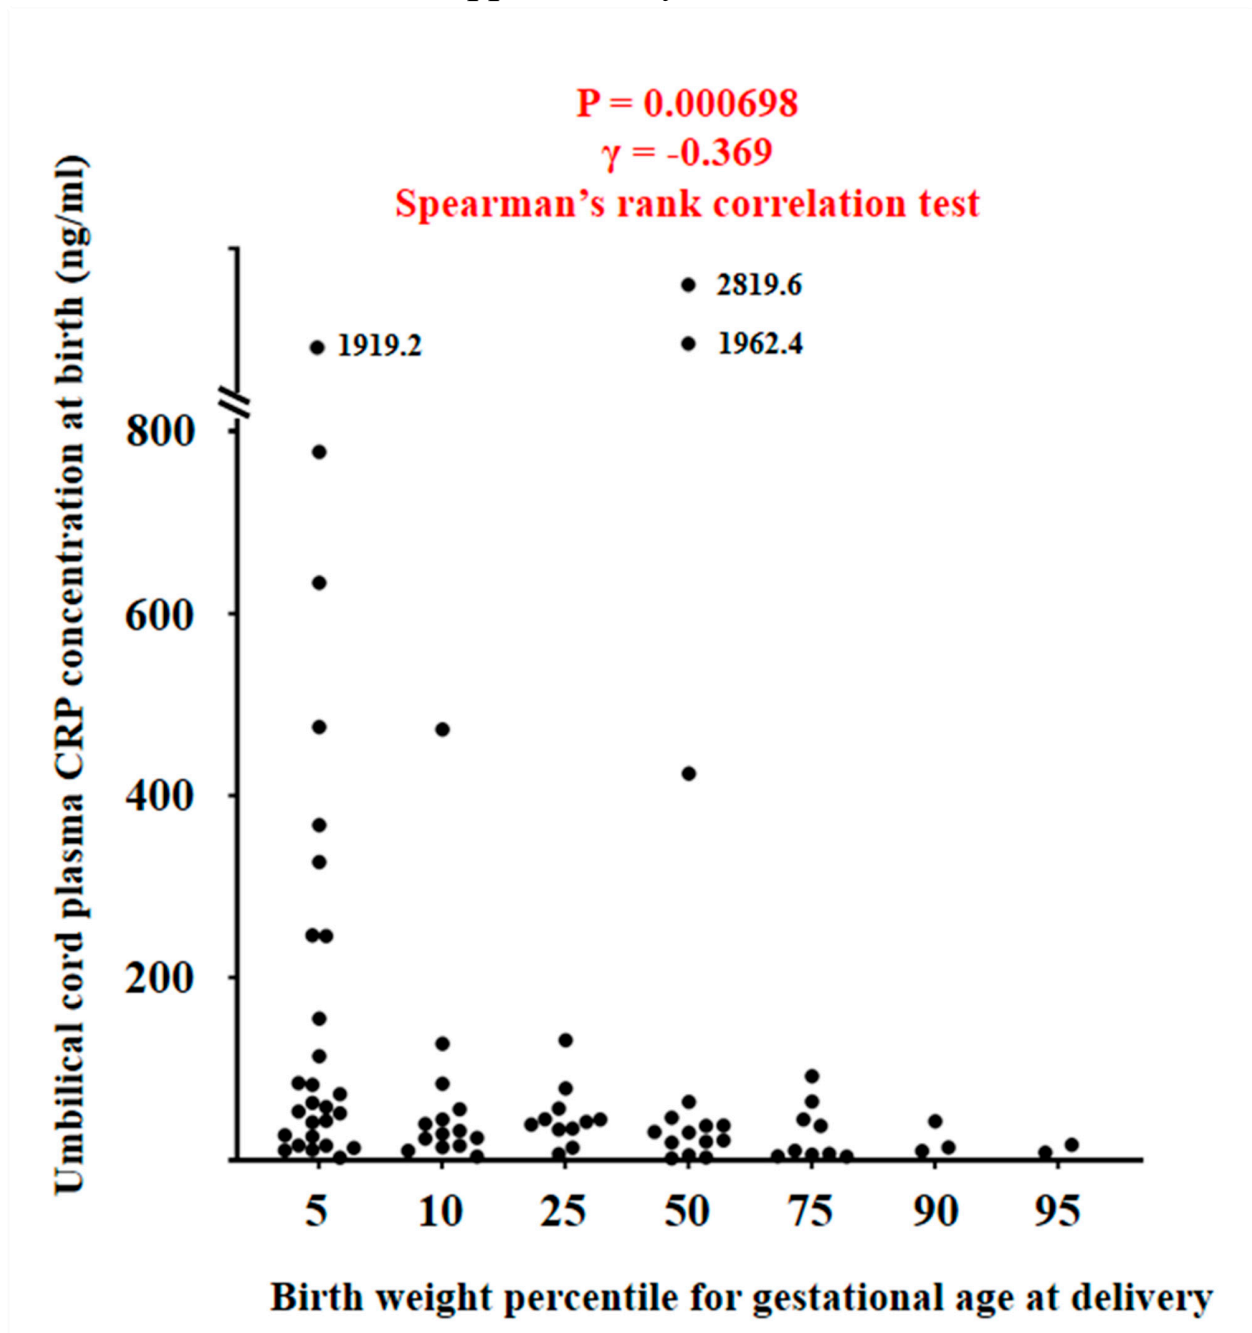

**Supplementary Figure 1 (Figure S1).** Relationship between umbilical cord plasma (UCP) CRP concentrations at birth and birth weight (BW) percentile for gestational age (GA) at delivery. UCP CRP concentrations at birth were inversely correlated to BW percentile for GA at delivery (Spearman's rank correlation test,  $P=0.000698$ ,  $\gamma=-0.369$ ).

**Supplementary Table 1.** Clinical and pregnant information of study population according to the presence or absence of low-grade fetal inflammatory response (FIR)

|                                                    | Low-grade FIR (-)    | Low-grade FIR (+)    |                |
|----------------------------------------------------|----------------------|----------------------|----------------|
|                                                    | UCP CRP < 52.8 ng/ml | UCP CRP ≥ 52.8 ng/ml | <i>P</i> value |
|                                                    | (n=52)               | (n=29)               |                |
|                                                    | 64.2% (52/81)        | 35.8% (29/81)        |                |
| Mean maternal age, y (± SD)                        | 31.9 ± 4.4           | 31.2 ± 4.9           | 0.653          |
| Parity ≥1                                          | 55.8% (29/52)        | 37.9% (11/29)        | 0.165          |
| Median GA at amniocentesis, week (range)           | 31.3 (25.3-33.4)     | 30.3 (25.9-33.4)     | 0.035          |
| Antenatal corticosteroids use                      | 67.3% (35/52)        | 65.5% (19/29)        | 1.000          |
| Antibiotics use                                    | 25.0% (13/52)        | 10.3% (3/29)         | 0.150          |
| Cesarean delivery                                  | 88.5% (46/52)        | 100% (29/29)         | 0.083          |
| Male newborn                                       | 61.5% (32/52)        | 44.8% (13/29)        | 0.168          |
| Causes of preterm delivery                         |                      |                      | 0.092          |
| PTL or preterm-PROM                                | 28.8% (15/52)        | 10.3% (3/29)         |                |
| Maternal fetal indication                          | 71.2% (37/52)        | 89.7% (26/29)        |                |
| Median GA at delivery, week (range)                | 31.4 (25.3-33.4)     | 30.3 (25.9-33.4)     | 0.027          |
| Birth weight, g (± SD)                             | 1370 ± 440           | 1002 ± 321           | 0.000          |
| 1-min Apgar score of < 7                           | 67.3% (35/52)        | 82.8% (24/29)        | 0.193          |
| 5-min Apgar score of < 7                           | 40.4% (21/52)        | 62.1% (18/29)        | 0.069          |
| Umbilical arterial pH at birth ≤ 7.15 <sup>a</sup> | 15.7% (8/51)         | 25.0% (6/24)         | 0.355          |
| FGR                                                | 19.2% (10/52)        | 44.8% (13/29)        | 0.021          |
| EONS <sup>b</sup>                                  | 14.0% (7/50)         | 44.8% (13/29)        | 0.003          |

*AF*, amniotic fluid; *CRP*, C-reactive protein; *EONS*, early-onset neonatal sepsis; *FGR*, fetal growth restriction; *FIR*, fetal inflammatory response; *GA*, gestational age; *preterm-PROM*, preterm premature rupture of membranes; *PTL*, preterm labor and intact membranes; *SD*, standard deviation; *UCP*, umbilical cord plasma

<sup>a</sup> Of 81 cases which were included in the analysis of this table, seventy-five patients had an umbilical cord ABGA at birth, but 6 patients did not have an umbilical cord ABGA at birth because of the limited amount of umbilical cord arterial blood.

<sup>b</sup> Of 81 cases which met the entry for this study, seventy-nine patients were included in this analysis, because two neonates died shortly after delivery as a result of extreme prematurity and thus could not be evaluated with respect to the presence or absence of EONS.

**Supplementary Table 2.** Clinical and pregnant information of study population according to the presence or absence of fetal inflammatory response syndrome (FIRS)

|                                                    | FIRS (-)            | FIRS (+)            |                |
|----------------------------------------------------|---------------------|---------------------|----------------|
|                                                    | UCP CRP < 200 ng/ml | UCP CRP ≥ 200 ng/ml | <i>P</i> value |
|                                                    | (n=69)              | (n=12)              |                |
|                                                    | 85.2% (69/81)       | 14.8% (12/81)       |                |
| Mean maternal age, y (± SD)                        | 32.0 ± 4.4          | 29.8 ± 5.4          | 0.140          |
| Parity ≥1                                          | 53.6% (37/69)       | 25.0% (3/12)        | 0.116          |
| Median GA at amniocentesis, week (range)           | 31.1 (25.3-33.4)    | 30.7 (26.9-32.6)    | 0.406          |
| Antenatal corticosteroids use                      | 65.2% (45/69)       | 75.0% (9/12)        | 0.742          |
| Antibiotics use                                    | 23.2% (16/69)       | 0% (0/12)           | 0.111          |
| Cesarean delivery                                  | 91.3% (63/69)       | 100% (12/12)        | 0.584          |
| Male newborn                                       | 59.4% (41/69)       | 33.3% (4/12)        | 0.121          |
| Causes of preterm delivery                         |                     |                     | 0.283          |
| PTL or preterm-PROM                                | 24.6% (17/69)       | 8.3% (1/12)         |                |
| Maternal fetal indication                          | 75.4% (52/69)       | 91.7% (11/12)       |                |
| Median GA at delivery, week (range)                | 31.1 (25.3-33.4)    | 30.7 (26.9-32.6)    | 0.365          |
| Birth weight, g (± SD)                             | 1288 ± 445          | 956 ± 241           | 0.006          |
| 1-min Apgar score of < 7                           | 72.5% (50/69)       | 75.0% (9/12)        | 1.000          |
| 5-min Apgar score of < 7                           | 46.4% (32/69)       | 58.3% (7/12)        | 0.538          |
| Umbilical arterial pH at birth ≤ 7.15 <sup>a</sup> | 19.4% (13/67)       | 12.5% (1/8)         | 1.000          |
| FGR                                                | 23.2% (16/69)       | 58.3% (7/12)        | 0.032          |
| EONS <sup>b</sup>                                  | 22.4% (15/67)       | 41.7% (5/12)        | 0.168          |

AF, amniotic fluid; CRP, C-reactive protein; EONS, early-onset neonatal sepsis; FGR, fetal growth restriction; FIRS, fetal inflammatory response syndrome; GA, gestational age; *preterm-PROM*, preterm premature rupture of membranes; PTL, preterm labor and intact membranes; SD, standard deviation; UCP, umbilical cord plasma

<sup>a</sup> Of 81 cases which were included in the analysis of this table, seventy-five patients had an umbilical cord ABGA at birth, but 6 patients did not have an umbilical cord ABGA at birth because of the limited amount of umbilical cord arterial blood.

<sup>b</sup> Of 81 cases which met the entry for this study, seventy-nine patients were included in this analysis, because two neonates died shortly after delivery as a result of extreme prematurity and thus could not be evaluated with respect to the presence or absence of EONS.
